# Supplementary material
Source: Springer Nature journal article supplement (https://www.springermedizin.de/resource/supplementary/12879_2012_2061_MOESM1_ESM.pdf/9443314)

### Control Culture

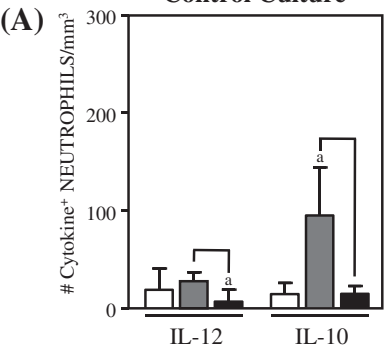

### Stimulated Culture

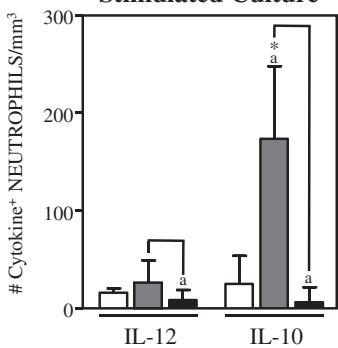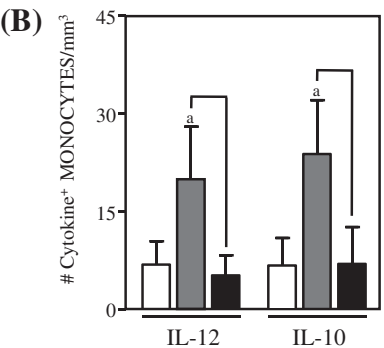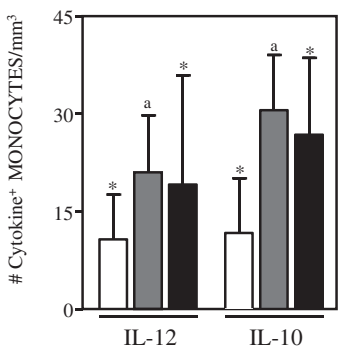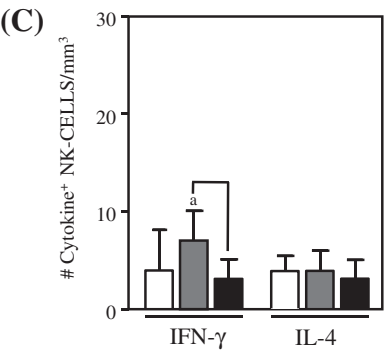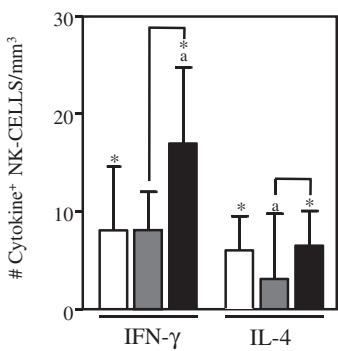

Supplement: MOESM1 [file 9443314]
